# Supplementary material
Source: Research Square preprint supplement (doi:10.21203/rs.3.rs-8807848/v1)
Supplement: Supplementary file 1 [file c75aa80af6b19232caffa4a7.docx]

Location of Survey:

Dear Sir/Madam!

In order to understand the healthcare and elderly care issues in rural areas of Shanxi’s counties and townships, we kindly ask you to fill out the following questionnaire based on the actual situation of elderly persons aged 60 and above in your family or among your relatives and friends. Your responses will help reflect the current challenges of healthcare and elderly care in rural Shanxi. We assure you that all the information you provide will be kept strictly confidential and will not result in any disclosure of your or your family’s privacy.

We sincerely appreciate your cooperation!

Shanxi Medical University Medical and Elderly Care Research Team

**Part 1 General demographic information**

1. Gender: ① Male ② Female
2. Age:
3. Educational level: ①Primary school or below ②Junior high school education ③High school or above
4. Marital status: ①Married ②Single
5. Current living condition: ①With family ②With relatives or friends ③Living alone
6. Within the past six months of the survey, did you suffer from a chronic illness diagnosed by a doctor？（Multiple choice）: ①Hypertension ②Abnormal blood lipids (high blood lipids or low blood lipids) ③Diabetes or elevated blood sugar (including impaired glucose tolerance and elevated fasting blood sugar) ④Chronic bronchitis ⑤Coronary heart disease ⑥Stroke ⑦Kidney disease ⑧Arthritis or rheumatism ⑨Memory-related diseases (such as Alzheimer's disease, brain atrophy, Parkinson's disease) ⑩Cancer ⑪Other ⑫No diseases

**Part 2 Social Capital Information**

| Items | Rarely | Less | Occasionally | Often | Always |
| --- | --- | --- | --- | --- | --- |
| 1. Do you have a good relationship with your children? |  |  |  |  |  |
| 2. Do your family members often show concern for you? |  |  |  |  |  |
| 3. Do you need financial support from your family for daily living? |  |  |  |  |  |
| 4. In the past year, have you often participated in community or social group activities? |  |  |  |  |  |
| 5. In the past year, have you received help from community or social groups? |  |  |  |  |  |
| 6. Do you trust healthcare institutions (disease control centers, hospitals)? |  |  |  |  |  |
| 7. Do you trust government departments? |  |  |  |  |  |
| 8. Do you feel that society treats you fairly? |  |  |  |  |  |
| 9. Do you have many people with whom you conduct daily financial or economic transactions? |  |  |  |  |  |
| 10. In the past month, how often have you socialized with people other than your family? |  |  |  |  |  |
| 11. When you are sick or face difficulties, are you able to receive help and care from others? |  |  |  |  |  |
| 12. Do you trust the person you interact with regularly? |  |  |  |  |  |
| 13. Are you concerned about events happening in your village? |  |  |  |  |  |
| 14. Do you agree that people living in the same village can be trusted? |  |  |  |  |  |

**Part 3 Activities of daily living**

Instructions: Please select the one that suits your situation and tick the appropriate box.

| Items | I can do it by myself | I can do it by myself, with some difficulty | I need some help | I cannot do it at all |
| --- | --- | --- | --- | --- |
| Using public transportation |  |  |  |  |
| Walk |  |  |  |  |
| Cooking |  |  |  |  |
| Doing housework |  |  |  |  |
| Taking medication |  |  |  |  |
| Eating meals |  |  |  |  |
| Dressing |  |  |  |  |
| Comb your hair, brush your teeth, etc |  |  |  |  |
| Doing laundry |  |  |  |  |
| Bathing |  |  |  |  |
| Shopping |  |  |  |  |
| Using the toilet |  |  |  |  |
| Making phone calls |  |  |  |  |
| Managing personal finances |  |  |  |  |

**Part 4 Presence of depressive symptoms**

| Items | No | Yes |
| --- | --- | --- |
| 1. Are you satisfied with life? |  |  |
| 2. Do you often get bored? |  |  |
| 3. Do you often feel that no matter what you do, it's useless? |  |  |
| 4. Do you prefer to stay at home? |  |  |
| 5. Do you feel that living is worthless right now? |  |  |

**Part 5 Elderly care service demands**

1. **Daily Living Support Services**

**A1** (1) If community dining services can be provided, how would you feel:

① I like it that way ② It must be that way ③ I am neutral ④ I can live with it ⑤ I dislike it that way

(2) If such services can’t be provided, how would you feel:

① I dislike it that way ② I can live with it ③ I am neutral ④ It must be that way ⑤ I like it that way

**A2**(1) If personal hygiene assistance service can be provided, how would you feel:

① I like it that way ② It must be that way ③ I am neutral ④ I can live with it ⑤ I dislike it that way

(2) If such service can’t be provided, how would you feel:

① I dislike it that way ② I can live with it ③ I am neutral ④ It must be that way ⑤ I like it that way

**A3**(1) If housekeeping and cleaning service can be provided, how would you feel:

① I like it that way ② It must be that way ③ I am neutral ④ I can live with it ⑤ I dislike it that way

(2) If such service can’t be provided, how would you feel:

① I dislike it that way ② I can live with it ③ I am neutral ④ It must be that way ⑤ I like it that way

**A4**(1) If short-term care service can be provided, how would you feel:

① I like it that way ② It must be that way ③ I am neutral ④ I can live with it ⑤ I dislike it that way

(2) If such service can’t be provided, how would you feel:

① I dislike it that way ② I can live with it ③ I am neutral ④ It must be that way ⑤ I like it that way

**A5**(1) If shopping assistance service can be provided, how would you feel:

① I like it that way ② It must be that way ③ I am neutral ④ I can live with it ⑤ I dislike it that way

(2) If such service can’t be provided, how would you feel:

① I dislike it that way ② I can live with it ③ I am neutral ④ It must be that way ⑤ I like it that way

**A6**(1) If proxy service for payments and errands can be provided, how would you feel:

① I like it that way ② It must be that way ③ I am neutral ④ I can live with it ⑤ I dislike it that way

(2) If such service can’t be provided, how would you feel:

① I dislike it that way ② I can live with it ③ I am neutral ④ It must be that way ⑤ I like it that way

**A7**(1) If smartphone training courses can be provided, how would you feel:

① I like it that way ② It must be that way ③ I am neutral ④ I can live with it ⑤ I dislike it that way

(2) If such service can’t be provided, how would you feel:

① I dislike it that way ② I can live with it ③ I am neutral ④ It must be that way ⑤ I like it that way

**A8**(1) If emergency assistance service can be provided, how would you feel:

① I like it that way ② It must be that way ③ I am neutral ④ I can live with it ⑤ I dislike it that way

(2) If such service can’t be provided, how would you feel:

① I dislike it that way ② I can live with it ③ I am neutral ④ It must be that way ⑤ I like it that way

**A9**(1) If emergency call devices can be provided, how would you feel:

① I like it that way ② It must be that way ③ I am neutral ④ I can live with it ⑤ I dislike it that way

(2) If such service can’t be provided, how would you feel:

① I dislike it that way ② I can live with it ③ I am neutral ④ It must be that way ⑤ I like it that way

**A10**(1) If barrier-free modifications service can be provided, how would you feel:

① I like it that way ② It must be that way ③ I am neutral ④ I can live with it ⑤ I dislike it that way

(2) If such service can’t be provided, how would you feel:

① I dislike it that way ② I can live with it ③ I am neutral ④ It must be that way ⑤ I like it that way

**A11**(1) If home visits service can be provided, how would you feel:

① I like it that way ② It must be that way ③ I am neutral ④ I can live with it ⑤ I dislike it that way

(2) If such service can’t be provided, how would you feel:

① I dislike it that way ② I can live with it ③ I am neutral ④ It must be that way ⑤ I like it that way

**A12**(1) If mobility assistance service can be provided, how would you feel:

① I like it that way ② It must be that way ③ I am neutral ④ I can live with it ⑤ I dislike it that way

(2) If such service can’t be provided, how would you feel:

① I dislike it that way ② I can live with it ③ I am neutral ④ It must be that way ⑤ I like it that way

1. **Medical and Health Care Services**

**B1**(1) If medication guidance service can be provided, how would you feel:

① I like it that way ② It must be that way ③ I am neutral ④ I can live with it ⑤ I dislike it that way

(2) If such service can’t be provided, how would you feel:

① I dislike it that way ② I can live with it ③ I am neutral ④ It must be that way ⑤ I like it that way

**B2**(1) If health education service can be provided, how would you feel:

① I like it that way ② It must be that way ③ I am neutral ④ I can live with it ⑤ I dislike it that way

(2) If such service can’t be provided, how would you feel:

① I dislike it that way ② I can live with it ③ I am neutral ④ It must be that way ⑤ I like it that way

**B3**(1) If regular health check-ups service can be provided, how would you feel:

① I like it that way ② It must be that way ③ I am neutral ④ I can live with it ⑤ I dislike it that way

(2) If such service can’t be provided, how would you feel:

① I dislike it that way ② I can live with it ③ I am neutral ④ It must be that way ⑤ I like it that way

**B4**(1) If disease prevention service can be provided, how would you feel:

① I like it that way ② It must be that way ③ I am neutral ④ I can live with it ⑤ I dislike it that way

(2) If such service can’t be provided, how would you feel:

① I dislike it that way ② I can live with it ③ I am neutral ④ It must be that way ⑤ I like it that way

**B5**(1) If health records service can be provided, how would you feel:

① I like it that way ② It must be that way ③ I am neutral ④ I can live with it ⑤ I dislike it that way

(2) If such service can’t be provided, how would you feel:

① I dislike it that way ② I can live with it ③ I am neutral ④ It must be that way ⑤ I like it that way

**B6**(1) If chronic disease management service can be provided, how would you feel:

① I like it that way ② It must be that way ③ I am neutral ④ I can live with it ⑤ I dislike it that way

(2) If such service can’t be provided, how would you feel:

① I dislike it that way ② I can live with it ③ I am neutral ④ It must be that way ⑤ I like it that way

**B7**(1) If rehabilitation guidance service can be provided, how would you feel:

① I like it that way ② It must be that way ③ I am neutral ④ I can live with it ⑤ I dislike it that way

(2) If such service can’t be provided, how would you feel:

① I dislike it that way ② I can live with it ③ I am neutral ④ It must be that way ⑤ I like it that way

**B8**(1) If bedridden care service can be provided, how would you feel:

① I like it that way ② It must be that way ③ I am neutral ④ I can live with it ⑤ I dislike it that way

(2) If such service can’t be provided, how would you feel:

① I dislike it that way ② I can live with it ③ I am neutral ④ It must be that way ⑤ I like it that way

**B9**(1) If general disease diagnosis and treatment service can be provided, how would you feel:

① I like it that way ② It must be that way ③ I am neutral ④ I can live with it ⑤ I dislike it that way

(2) If such service can’t be provided, how would you feel:

① I dislike it that way ② I can live with it ③ I am neutral ④ It must be that way ⑤ I like it that way

**B10**(1) If chaperone services can be provided, how would you feel:

① I like it that way ② It must be that way ③ I am neutral ④ I can live with it ⑤ I dislike it that way

(2) If such services can’t be provided, how would you feel:

① I dislike it that way ② I can live with it ③ I am neutral ④ It must be that way ⑤ I like it that way

**B11**(1) If free professional medical consultations service can be provided, how would you feel:

① I like it that way ② It must be that way ③ I am neutral ④ I can live with it ⑤ I dislike it that way

(2) If such service can’t be provided, how would you feel:

① I dislike it that way ② I can live with it ③ I am neutral ④ It must be that way ⑤ I like it that way

**B12**(1) If home hospitalization service can be provided, how would you feel:

① I like it that way ② It must be that way ③ I am neutral ④ I can live with it ⑤ I dislike it that way

(2) If such service can’t be provided, how would you feel:

① I dislike it that way ② I can live with it ③ I am neutral ④ It must be that way ⑤ I like it that way

**B13**(1) If In-home medical visits service can be provided, how would you feel:

① I like it that way ② It must be that way ③ I am neutral ④ I can live with it ⑤ I dislike it that way

(2) If such service can’t be provided, how would you feel:

① I dislike it that way ② I can live with it ③ I am neutral ④ It must be that way ⑤ I like it that way

**B14**(1) If rehabilitation equipment rental service can be provided, how would you feel:

① I like it that way ② It must be that way ③ I am neutral ④ I can live with it ⑤ I dislike it that way

(2) If such service can’t be provided, how would you feel:

① I dislike it that way ② I can live with it ③ I am neutral ④ It must be that way ⑤ I like it that way

**B15**(1) If hospice care service can be provided, how would you feel:

① I like it that way ② It must be that way ③ I am neutral ④ I can live with it ⑤ I dislike it that way

(2) If such service can’t be provided, how would you feel:

① I dislike it that way ② I can live with it ③ I am neutral ④ It must be that way ⑤ I like it that way

1. **Emotional and Psychological Support Services**

**C1** (1) If elderly education and training service can be provided, how would you feel:

① I like it that way ② It must be that way ③ I am neutral ④ I can live with it ⑤ I dislike it that way

(2) If such service can’t be provided, how would you feel:

① I dislike it that way ② I can live with it ③ I am neutral ④ It must be that way ⑤ I like it that way

**C2**(1) If volunteer companionship service can be provided, how would you feel:

① I like it that way ② It must be that way ③ I am neutral ④ I can live with it ⑤ I dislike it that way

(2) If such service can’t be provided, how would you feel:

① I dislike it that way ② I can live with it ③ I am neutral ④ It must be that way ⑤ I like it that way

**C3**(1) If organizing activities for older people service can be provided, how would you feel:

① I like it that way ② It must be that way ③ I am neutral ④ I can live with it ⑤ I dislike it that way

(2) If such service can’t be provided, how would you feel:

① I dislike it that way ② I can live with it ③ I am neutral ④ It must be that way ⑤ I like it that way

**C4**(1) If fitness activity venues service can be provided, how would you feel:

① I like it that way ② It must be that way ③ I am neutral ④ I can live with it ⑤ I dislike it that way

(2) If such service can’t be provided, how would you feel:

① I dislike it that way ② I can live with it ③ I am neutral ④ It must be that way ⑤ I like it that way

**C5**(1) If social participation service can be provided, how would you feel:

① I like it that way ② It must be that way ③ I am neutral ④ I can live with it ⑤ I dislike it that way

(2) If such service can’t be provided, how would you feel:

① I dislike it that way ② I can live with it ③ I am neutral ④ It must be that way ⑤ I like it that way

**C6**(1) If legal consultation assistance service can be provided, how would you feel:

① I like it that way ② It must be that way ③ I am neutral ④ I can live with it ⑤ I dislike it that way

(2) If such service can’t be provided, how would you feel:

① I dislike it that way ② I can live with it ③ I am neutral ④ It must be that way ⑤ I like it that way

**C7**(1) If mediation of neighbourhood disputes service can be provided, how would you feel:

① I like it that way ② It must be that way ③ I am neutral ④ I can live with it ⑤ I dislike it that way

(2) If such service can’t be provided, how would you feel:

① I dislike it that way ② I can live with it ③ I am neutral ④ It must be that way ⑤ I like it that way

**C8**(1) If publicity of elder care policies service can be provided, how would you feel:

① I like it that way ② It must be that way ③ I am neutral ④ I can live with it ⑤ I dislike it that way

(2) If such service can’t be provided, how would you feel:

① I dislike it that way ② I can live with it ③ I am neutral ④ It must be that way ⑤ I like it that way

**C9**(1) If psychological counselling and support service can be provided, how would you feel:

① I like it that way ② It must be that way ③ I am neutral ④ I can live with it ⑤ I dislike it that way

(2) If such service can’t be provided, how would you feel:

① I dislike it that way ② I can live with it ③ I am neutral ④ It must be that way ⑤ I like it that way
